# Supplementary material
Source: Springer Nature journal article supplement (https://www.springerprofessional.de/resource/supplementary/40702_2022_922_MOESM1_ESM.pdf/23687022)
Supplement: MOESM1 [file 23687022]

## Ergänzende Zitate zu Potenzialen

| ID                               | Potenzial                         | Beschreibung                                                                                                           | Beispiele für unterstützende, stichhaltige Zitate aus den Interviews                                                                                                                                                                                                                                                                                                                                                                                                                                                                                                                                                    |
|----------------------------------|-----------------------------------|------------------------------------------------------------------------------------------------------------------------|-------------------------------------------------------------------------------------------------------------------------------------------------------------------------------------------------------------------------------------------------------------------------------------------------------------------------------------------------------------------------------------------------------------------------------------------------------------------------------------------------------------------------------------------------------------------------------------------------------------------------|
| P00                              | Höhere Datenverfügbarkeit         | Datenmarktplätze führen zu einer höheren Verfügbarkeit von Daten für das Training von KI-Modellen im Gesundheitswesen. | <p>“Daten Verfügbarkeit wird verbessert” (i01)</p> <p>“Dann haben wir große Datensätze da haben wir auch die Möglichkeit, diese Datenmarktplätze quasi verfügbar zu machen und nutzbar zu machen. Sind wir halt heute in der Regel noch von entfernt, weil die großen Datenmengen, die ich benötige, finde ich heute nur in der Vergangenheit und da ist halt nichts unterschrieben.” (i02)</p> <p>“Die Patienten könnten natürlich auch profitieren da durch diesen Datenpool eine Menge Gesundheitsdaten für die Forschung anonymisiert verarbeitet werden können, was auch für Patienten vorteilhaft ist.” (i04)</p> |
| <b>Technologische Potenziale</b> |                                   |                                                                                                                        |                                                                                                                                                                                                                                                                                                                                                                                                                                                                                                                                                                                                                         |
| P01                              | Bessere KI-Modelle und Ergebnisse | KI-Modelle und Ergebnisse werden robuster, können verfügbare Daten ergänzen und damit Verzerrungen überwinden.         | <p>“bessere Modelle können entstehen und dadurch erhält man bessere Ergebnisse” (i01)</p> <p>“Wenn man einen Datenpool von medizinischen Daten hat, kann die Gesellschaft davon profitieren. Weil Krankheiten gegebenenfalls durch so einen Datenpool mit Forschungsdaten besser erkannt und erforscht werden könnten” (i04)</p> <p>“Also ein Vorteil ist häufig, dass wir robustere Modelle trainieren können,” (i05)</p>                                                                                                                                                                                              |

|                                     |                                             |                                                                                               |                                                                                                                                                                                                                                                                                                                                                                                                                                                                                                                                                                                                                                                                                                                                                                                                         |
|-------------------------------------|---------------------------------------------|-----------------------------------------------------------------------------------------------|---------------------------------------------------------------------------------------------------------------------------------------------------------------------------------------------------------------------------------------------------------------------------------------------------------------------------------------------------------------------------------------------------------------------------------------------------------------------------------------------------------------------------------------------------------------------------------------------------------------------------------------------------------------------------------------------------------------------------------------------------------------------------------------------------------|
| P02                                 | Bessere Abdeckung von Minoritäten           | Weniger Verzerrungen und Diskriminierung und größere Datenvielfalt.                           | <p>“Möchte man zum Beispiel Referenzwerte für schwangere Frauen mit einer speziellen Vorerkrankung, dann gibt es da im Moment eben nur sehr wenige Datensätze. Wenn Daten zusammengeführt werden, können vielleicht bessere Ergebnisse abgeleitet werden, als wenn eine Studie nur aus drei Personen besteht.” (i01)</p> <p>“Und genau das entsteht, wenn ich quasi mit einem sehr dedizierten Datensatz arbeite und die Mischung und Durchsetzung fehlt, und das ist etwas, was Datenmarktplätze aus meiner Sicht Ideal typischerweise entsprechend anbieten können, dass man eben auf einen Datenbestand zugreifen kann, der von sehr verschiedenen Stellen kommt.” (i02)</p> <p>“Das kann auch ein Bias und eine Diskriminierung reduzieren, da wir dann eben auf diversen Daten beruhen.” (i05)</p> |
| <b>Organisationale Potenziale</b>   |                                             |                                                                                               |                                                                                                                                                                                                                                                                                                                                                                                                                                                                                                                                                                                                                                                                                                                                                                                                         |
| P03                                 | Effizientere Ressourcenverwendung           | Akteur:innen im Gesundheitswesen können verfügbare Ressourcen schneller und besser einsetzen. | <p>“Ich sehe außerdem darin eine Chance, dass man Mittel und Ressourcen effizienter nutzen kann” (i01)</p> <p>“Das Gesundheitssystem ist sehr teuer, aber auch sehr wichtig, deshalb sollte man sich Gedanken machen, wie man öffentliche und private Mittel nutzen sollte. Gibt es zum Beispiel schon einen guten Datensatz zu einem bestimmten Thema an einer Klinik, warum sollte dann nicht auch eine andere Uniklinik oder die Gemeinschaft davon profitieren.” (i01)</p>                                                                                                                                                                                                                                                                                                                          |
| P04                                 | Demokratisierung von Datenzugängen          | Kleine und mittelständische Unternehmen erhalten Zugriff auf große Datenmengen.               | “Sie können natürlich einen erheblichen Wert schaffen, auch für kleine und mittelständische Unternehmen, die sonst nicht Zugriff hätten auf so große Datentöpfe.” (i05)                                                                                                                                                                                                                                                                                                                                                                                                                                                                                                                                                                                                                                 |
| P05                                 | Erschließung neuer Anwendungsgebiete für KI | Unerforschte Krankheiten und neue Anwendungsgebiete können untersucht werden.                 | “Ärzte können davon auch profitieren, weil man aus so einem Datenpool auch Informationen über unerforschte Krankheiten ziehen könnte.” (i04)                                                                                                                                                                                                                                                                                                                                                                                                                                                                                                                                                                                                                                                            |
| <b>Umgebungsbezogene Potenziale</b> |                                             |                                                                                               |                                                                                                                                                                                                                                                                                                                                                                                                                                                                                                                                                                                                                                                                                                                                                                                                         |

|     |                                              |                                                                                    |                                                                                                                                                                                                                                                                                                                                                                                                                                                                                                                                      |
|-----|----------------------------------------------|------------------------------------------------------------------------------------|--------------------------------------------------------------------------------------------------------------------------------------------------------------------------------------------------------------------------------------------------------------------------------------------------------------------------------------------------------------------------------------------------------------------------------------------------------------------------------------------------------------------------------------|
| P06 | Etablierung von Standards und Schnittstellen | Standards werden etabliert und Schnittstellen werden vereinheitlicht.              | <p>“Ein anderer Vorteil – eher aus der technischen Sicht – könnte sein, dass wenn man so einen Marktplatz hat, wie auch immer dieser gestaltet ist, können sich daraus Standards und Schnittstellen etablieren.” (i01)</p> <p>“Es gibt sehr viele Anbieter und sehr viele Möglichkeiten, dass sich da einer sozusagen durchsetzt.” (i01)</p>                                                                                                                                                                                         |
| P07 | Höheres Vertrauen in Digitalisierung         | Durch positive Anwendungsbeispiele wird das Vertrauen in Digitalisierung gestärkt. | <p>“Es wird sicherlich niemand dagegen etwas haben, wenn man anonymisierte Daten verwendet, um eine bessere Krebserkennung herzustellen, und so kann man Vertrauen schaffen, also Datenmarktplätze können auch dazu genutzt werden, die Digitalisierung weiterzuverbreiten, nützlich zu verbreiten in der Gesellschaft und ein Vertrauen darin zu schaffen.” (i05)</p> <p>“[...] und auch eine höhere Beteiligung sorgen, weil man sichtbar macht, wie nützlich Daten sind und wofür sie verwendet werden, im Sinne aller” (i05)</p> |
